# Supplementary material for: Validation study of meta-GGA functionals and of a model exchange–correlation potential in density functional calculations of EPR parameters
Source: Royal Society of Chemistry journal article supplement (doi:10.1039/b207171a), 2002-01-01
Supplement: b207171a-esi.doc [file b207171a-esi.doc]

**Supplementary Information for PCCP-B207171A:** *Validation study of meta-GGA functionals and of a model exchange-correlation potential in density functional calculations of EPR parameters*, by Alexei V. Arbuznikov, Martin Kaupp, Vladimir G. Malkin, Roman Reviakine, and Olga L. Malkina

Tables S1-S4 provide the detailed numerical data (g-shift and hyperfine coupling tensors) underlying the statistical and graphical analyses of the paper.

**Table S1.** Comparison of calculated and experimental g-shift components for light main group radicals (in ppm). IGLO-III basis set has been used for all atoms.

|  | | calc. | | | expt. *a)* |
| --- | --- | --- | --- | --- | --- |
| FT98 | PKZB | SAOP |
| H2O+ | g11 | -182 | -168 | -159 | 200 |
| g22 | 3611 | 3453 | 3713 | 4800 |
| g33 | 11438 | 9440 | 9549 | 18800 |
| CO+ | g || | -112 | -101 | -100 |  |
| g  | -2461 | -2237 | -2274 | -2400 |
| CO2- | g11 | 1006 | 1038 | 1222 | 880 |
| g22 | -5343 | -5150 | -5237 | -5070 |
| g33 | -709 | -717 | -745 | -710 |
| O3- | g11 | -410 | -408 | -652 | 1300 |
| g22 | 15332 | 14585 | 15308 | 16400 |
| g33 | 8671 | 8198 | 8679 | 10000 |
| HCO | g11 | 2146 | 2124 | 2135 | 1500 |
| g22 | -218 | -163 | -218 | 0 |
| g33 | -7580 | -7143 | -6943 | -7500 |
| H2CO+ | g11 | 5024 | 4702 | 4829 | 4600 |
| g22 | 114 | 109 | 261 | 200 |
| g33 | -783 | -790 | -768 | -800 |
| C3H5 | g11 | -41 | -41 | -49 | 0 |
| g22 | 495 | 455 | 465 | 400 |
| g33 | 635 | 586 | 597 | 800 |
| NO2 | g11 | -581 | -597 | -701 | -300 |
| g22 | 3305 | 3178 | 3444 | 3900 |
| g33 | -11084 | -10416 | -10437 | -11300 |

**Table S1 (Continued)**

|  | | calc. | | | expt. *a)* |
| --- | --- | --- | --- | --- | --- |
| FT98 | PKZB | SAOP |
| NF2 | g11 | -607 | -576 | -1145 | -100 |
| g22 | 4098 | 3918 | 2937 | 2800 |
| g33 | 6533 | 6194 | 5027 | 6200 |
| CN | g || | -111 | -104 | -106 |  |
| g  | -1768 | -1679 | -1744 | -2000 |
| MgF | g || | 6 | 12 | 36 | -300 |
| g  | -1587 | -1651 | -1257 | -1300 |
| BO | g || | -49.7 | -41.3 | -42.9 |  |
| g  | -1893 | -1702 | -1533 | -1700 |
| BS | g || | -66.4 | -58.1 | -55.5 |  |
| g  | -9235 | -8688 | -8385 | -8900 |

*a)*Cf. refs. 2,13 for detailed references to expt. data.

**Table S2** Comparison of calculated and expt. g-shift components for transition-metal complexes (in ppt). IGLO-II basis set has been used for ligands, 9s7p4d basis for 3d metals, and 11s9p6d for molybdenum.

|  | | calc. | | | expt. *a)* |
| --- | --- | --- | --- | --- | --- |
| FT98 | PKZB | SAOP |
| TiF3 | g || | -1.2 | -1.3 | -3.2 | -8.6 |
| g  | -31.2 | -29.1 | -22.6 | -116 |
| CrOF4- | g || | -26.3 | -27.5 | -20.4 | -43 |
| g  | -13.2 | -14.7 | -35.0 | -34 |
| CrOCl4- | g || | 17.0 | 16.5 | -16.1 | -10 |
| g  | -22.8 | -21.7 | -52.3 | -25 |
| MnO3 | g || | -0.2  3.4 *b)* | -0.6  2.3 *b)* | -11.3  -9.1 *b)* | -0.4 |
| g  | 2.9  3.9 *b)* | 2.0  3.1 *b)* | -30.9  -29.1 *b)* | 4.7 |
| Mn(CO)5 | g || | -1.9 | -1.3 | -8.5 | -2.3 |
| g  | 20.1 | 21.0 | 10.0 | 35.7 |
| Fe(CO)5+ | g || | -1.8 | -1.5 | -4.3 | -1.5 |
| g  | 48.5 | 46.4 | 34.6 | 79.15 |
| Co(CO)4 | g || | 5.5 | 4.5 | 18.5 | 3.6 |
| g  | 78.6 | 75.7 | 64.3 | 127.6 |
| Ni(CO)3H | g || | 2.4 | 2.2 | 3.0 | 1.9 |
| g  | 44.9 | 46.1 | 34.9 | 65.1 |
| Cu(NO3)2 | g11 | 112.4 | 120.7 | 100.9 | 263.8 |
| g22 | 28.1 | 29.6 | 23.6 | 49.9 |
| g33 | 30.4 | 32.2 | 24.9 | 49.9 |
| Cu(acac)2 | g11 | 83.3 | 86.7 | 67.0 | 285.2 |
| g22 | 21.3 | 21.8 | 16.4 | 48.7 |
| g33 | 25.8 | 26.0 | 19.8 | 48.7 |
| MoOF4- | g || | -43.9 | -45.1 | -40.4 | -107 |
| g  | -36.8 | -38.1 | -37.3 | -76 |
| MoOCl4- | g || | 15.8 | 10.5 | 3.2 | -33 |
| g  | -34.1 | -35.2 | 39.8 | -55 |

*a)*Cf. refs. 14,16 for detailed references to expt. data. *b)* Data obtained with EXTRAFINE angular grid and 128 radial shells.

**Table S3** Comparison of calculated and expt. isotropic and anisotropic hyperfine coupling constants for light main group radicals (in MHz). IGLO-III basis set has been used for all atoms.

|  | | | calc. | | | expt. *a)* |
| --- | --- | --- | --- | --- | --- | --- |
| FT98 | PKZB | SAOP |
| OH | 17O | Aiso | -34.6 | -31.3 | 147.1 | -51.3  -84.6 |
| Adip | -141.5 | -139.5 | -139.8 |  |
| 1H | Aiso | -58.6 | -66.4 | -100.4 | -63.9  -73.4 |
| Adip | 46.4 | 44.5 | 50.0 |  |
| CN | 13C | Aiso | 532.9 | 482.6 | 330.7 | 588.5 |
| Adip | 61.5 | 57.6 | 58.0 | 45.1 |
| 14N | Aiso | -5.5 | -12.9 | -33.1 | -12.6 |
| Adip | 21.0 | 21.5 | 22.4 | 15.4 |
| F2- | 19F | Aiso | 612.5 | 610.7 | -58.2 | 750.8 |
| Adip | 859.0 | 855.0 | 874.3 | 883.9 |
| FCl- | 19F | Aiso | 537.7 | 582.1 | 207.3 | 586.6 |
| Adip | 718.6 | 761.1 | 642.8 | 837.7 |
| 35Cl | Aiso | 99.0 | 116.2 | 84.7 | 152.2 |
| Adip | 98.0 | 91.7 | 104.0 | 101.2 |
| Cl2- | 19Cl | Aiso | 87.5 | 99.5 | 66.4 | 109.0 |
| Adip | 85.9 | 84.4 | 83.6 | 87.2 |
| CH3 | 13C | Aiso | 68.4 | 75.0 | -95.6 | 105.6  107.3 |
| Adip | 78.5 | 77.4 | 79.3 | 62.1 |
| 1H | Aiso | -50.0 | -68.8 | -51.3 | -64.5 |
| T11 | -0.09 | 1.37 | -3.38 | 1.4  2.2 |
| T22 | 39.7 | 39.0 | 45.9 | 35.0 |
| T33 | -39.6 | -40.3 | -42.5 | -35.0 |
| H2O+ | 17O | Aiso | -46.5 | -47.2 | 148.0 | -83.2 |
| T11 | 152.9 | 149.1 | 148.0 |  |
| T22 | 154.9 | 152.4 | 151.3 |  |
| T33 | -307.7 | -301.5 | -299.3 |  |
| 1H | Aiso | -60.5 | -70.2 | -102.5 | -73.1 |
| T11 | -25.1 | -23.5 | -28.2 |  |
| T22 | 92.4 | 88.0 | 96.7 |  |
| T33 | -67.3 | -64.5 | -68.5 |  |

**Table S3 (Continued)**

|  | | | calc. | | | expt. *a)* |
| --- | --- | --- | --- | --- | --- | --- |
| FT98 | PKZB | SAOP |
| H2CO+ | 17O | Aiso | -36.9 | -23.3 | 81.3 |  |
| T11 | -232.1 | -229.0 | -220.8 |  |
| T22 | 104.6 | 103.6 | 94.5 |  |
| T33 | 127.5 | 125.4 | 126.3 |  |
| 13C | Aiso | -43.1 | -80.3 | -71.6 | -108.7 |
| T11 | -25.5 | -22.5 | -28.1 | -14.3 |
| T22 | 6.83 | 6.80 | 6.18 | 4.3 |
| T33 | 18.7 | 15.7 | 21.9 | 10.4 |
| 1H | Aiso | 320.8 | 346.0 | 365.3 | 371.9 |
| T11 | -12.1 | -9.90 | -10.4 | -9.3 |
| T22 | -8.67 | -7.00 | -6.98 | (5.0) |
| T33 | 20.8 | 16.9 | 17.4 | (4.5) |
| HCO | 17O | Aiso | -36.6 | -21.4 | -47.7 |  |
| T11 | -106.7 | -106.1 | -103.2 |  |
| T22 | 58.1 | 56.3 | 55.0 |  |
| T33 | 48.6 | 49.8 | 48.3 |  |
| 13C | Aiso | 433.2 | 364.7 | 362.0 | 365.4  377.2 |
| T11 | -44.7 | -42.9 | -46.3 | -11.8  -24.1 |
| T22 | 85.9 | 82.7 | 90.1 | 50.4  72.0 |
| T33 | -41.2 | -39.8 | -43.8 | -38.7  -47.9 |
| 1H | Aiso | 326.4 | 337.5 | 363.6 | 354.2  380.6 |
| T11 | -16.5 | -15.2 | -17.8 | -13.7 |
| T22 | 24.0 | 21.4 | 26.3 | 25.2 |
| T33 | -7.53 | -6.23 | -8.51 | -9.0 |
| FCO | 19F | Aiso | 859.4 | 818.3 | 1144 | 905.8 |
| T11 | -330.3 | -330.8 | -316.0 |  |
| T22 | -318.4 | -321.0 | -308.6 |  |
| T33 | 648.8 | 651.9 | 624.6 |  |
| 13C | Aiso | 807.4 | 746.3 | 812.9 | 803.2 |
| T11 | -46.9 | -45.2 | -48.0 | -24.9 |
| T22 | -33.1 | -31.9 | -35.1 | -0.3 |
| T33 | 80.0 | 77.1 | 83.1 | 25.2 |
| 17O | Aiso | -46.3 | -37.7 | -47.6 |  |
| T11 | -84.7 | -84.7 | -84.4 |  |
| T22 | 35.5 | 35.3 | 35.7 |  |
| T33 | 49.2 | 49.4 | 48.7 |  |

**Table S3** (Continued)

|  | | | calc. | | | expt. *a)* |
| --- | --- | --- | --- | --- | --- | --- |
| FT98 | PKZB | SAOP |
| HCN- | 1H | Aiso | 330.4 | 310.5 | 368.1 | 384.5 |
| T11 | -6.55 | -6.94 | -7.09 | -14.0 |
| T22 | -2.73 | -3.52 | -2.53 | 0 |
| T33 | 9.28 | 10.5 | 9.62 | 14.0 |
| 13C | Aiso | 301.9 | 270.2 | 314.1 | 211.3 |
| T11 | -18.0 | -16.9 | -20.8 | -17.1 |
| T22 | 40.3 | 38.3 | 44.0 | 45.1 |
| T33 | -22.3 | -21.5 | -23.1 | -8.0 |
| 14N | Aiso | 17.6 | 11.2 | -0.27 | 19.9 |
| T11 | -20.2 | -20.2 | -22.2 | -19.6 |
| T22 | 39.8 | 40.0 | 41.8 | 39.0 |
| T33 | -19.6 | -19.8 | -19.7 | -19.6 |
| FCN- | 19F | Aiso | 1165 | 1099 | 1114 | 1363 |
| T11 | -532.8 | -535.4 | -471.2 | -426.2 |
| T22 | -527.6 | -530.7 | -467.0 | -376.3 |
| T33 | 1060 | 1066 | 938.2 | 801.8 |
| 13C | Aiso | 692.5 | 630.3 | 712.6 | 647.7 |
| T11 | -36.9 | -36.1 | -39.8 | -36.7 |
| T22 | -24.5 | -24.0 | -28.3 | -20.5 |
| T33 | 61.4 | 60.1 | 68.1 | 57.4 |
| 14N | Aiso | 13.1 | 9.86 | 1.05 | 17.9 |
| T11 | -11.1 | -11.4 | -11.9 | -12.8 |
| T22 | -15.8 | -15.8 | -16.7 | -14.8 |
| T33 | 26.9 | 27.2 | 28.6 | 27.2 |
| NO2 | 14N | Aiso | 146.6 | 139.6 | 131.2 | 153.3 |
| T11 | -17.8 | -17.5 | -18.7 | -15.1 |
| T22 | -19.2 | -18.7 | -20.9 | -21.9 |
| T33 | 37.0 | 36.2 | 39.6 | 37.3 |
| 17O | Aiso | -57.3 | -46.6 | -31.6 | -47.1  -61.1 |
| T11 | 54.9 | 54.4 | 55.4 | 58.9 |
| T22 | 52.5 | 52.2 | 54.6 | 47.1 |
| T33 | -107.4 | -106.6 | -110.1 | -106.2 |

*a)*Cf. ref. 21 for detailed references to expt. data.

**Table S4** Comparison of calculated and expt. isotropic and anisotropic (dipolar) hyperfine coupling constants on metal nuclei for 3d transition metal complexes (in MHz). IGLO-II basis set has been used for ligands, 9s7p4d basis for 3d metals.

|  | | | | | calc. | | | | | expt. *a)* |
| --- | --- | --- | --- | --- | --- | --- | --- | --- | --- | --- |
| FT98 | | PKZB | | SAOP |
| ScO | 45Sc | | Aiso | | 1933.2 | | 1737.5 | | 2106.7 | 1947.339(2) |
|  | | Adip | | 17.1 | | 17.6 | | 36.4 | 24.8053(7) |
| TiN | 47Ti | | Aiso | | -456.6 | | -362.5 | | 109.0 | -558.8(11) |
|  | | Adip | | (-2.4) | | (1.0) | | -4.2 | -5(2) |
| TiF3 | 47Ti | | Aiso | | -192.3 | | -224.9 | | -131.1 | -184.8(4) |
|  | | Adip | | -9.4 | | -7.6 | | -4.1 | -6.6(4) |
| MnO3 | 55Mn | | Aiso | | 1887.5  1975.2 *b)* | | 1865.0  1933.8 *b)* | | -414.9  -347.7 *b)* | 1613(6) |
|  | | Adip | | 91.6  91.3 *b)* | | 92.1  90.7 *b)* | | 99.4  100.7 *b)* | 81(3) |
| Mn(CO)5 | 55Mn | | Aiso | | -122.4 | | 9.3 | | -944.9 | -2.8 |
|  | | Adip | | 93.9 | | 93.1 | | 105.3 | 90(8)  92(6) |
| Mn(CN)4N- | 55Mn | | Aiso | | -207.1 | | -190.2 | | -2005.0 | -276 |
|  | | Adip | | -113.8 | | -114.8 | | -93.2 | -122.4 |
| Mn(CN)5NO2- | 55Mn | | Aiso | | -222.5 | | -174.2 | | -2142.3 | -219.5 |
|  | | Adip | | -92.0 | | -90.7 | | -21.2 | -115.2 |
| Fe(CO)5+ | 57Fe | | Aiso | | -12.1 | | -2.2 | | -96.4 | -2.2 |
|  | | Adip | | 19.2 | | 17.9 | | 17.5 | 15.4 |
| Co(CO)4 | 59Co | | Aiso | | 27.1 | | -43.5 | | -913.4 | -47.8 |
|  | | Adip | | 145.4 | | 148.9 | | 121.6 | 110.0 |
| Ni(CO)3H | 61Ni | | Aiso | | 45.6 | | 22.0 | | 63.2 | 9.0(2) |
|  |  | Adip | | -50.5 | | -51.4 | | -52.0 | | -44.0(2) |
| CuO | 63Cu | Aiso | | -944.3 | | -736.2 | | -1376.2 | | -483.6(94) |
|  | Adip | | -89.9 | | -85.4 | | -65.6 | | 24.1 |
| Cu(CO)3 | 63Cu | Aiso | | 18.3 | | 45.7 | | 397.0 | | 71.2 |
|  | Adip | | 65.1 | | 65.2 | | 74.0 | | 81 |

*a)*Cf. ref. 9 for detailed references to expt. data.The numbers in parentheses represent standard deviations. *b)* Data obtained with EXTRAFINE angular grid and 128 radial shells.
